# Supplementary material for: Leukocytic Infiltration of Intraductal Carcinoma of the Prostate: An Exploratory Study
Source: MDPI journal article supplement (doi:10.3390/cancers15082217), 2023-04-09
Supplement: s1 [file s1]

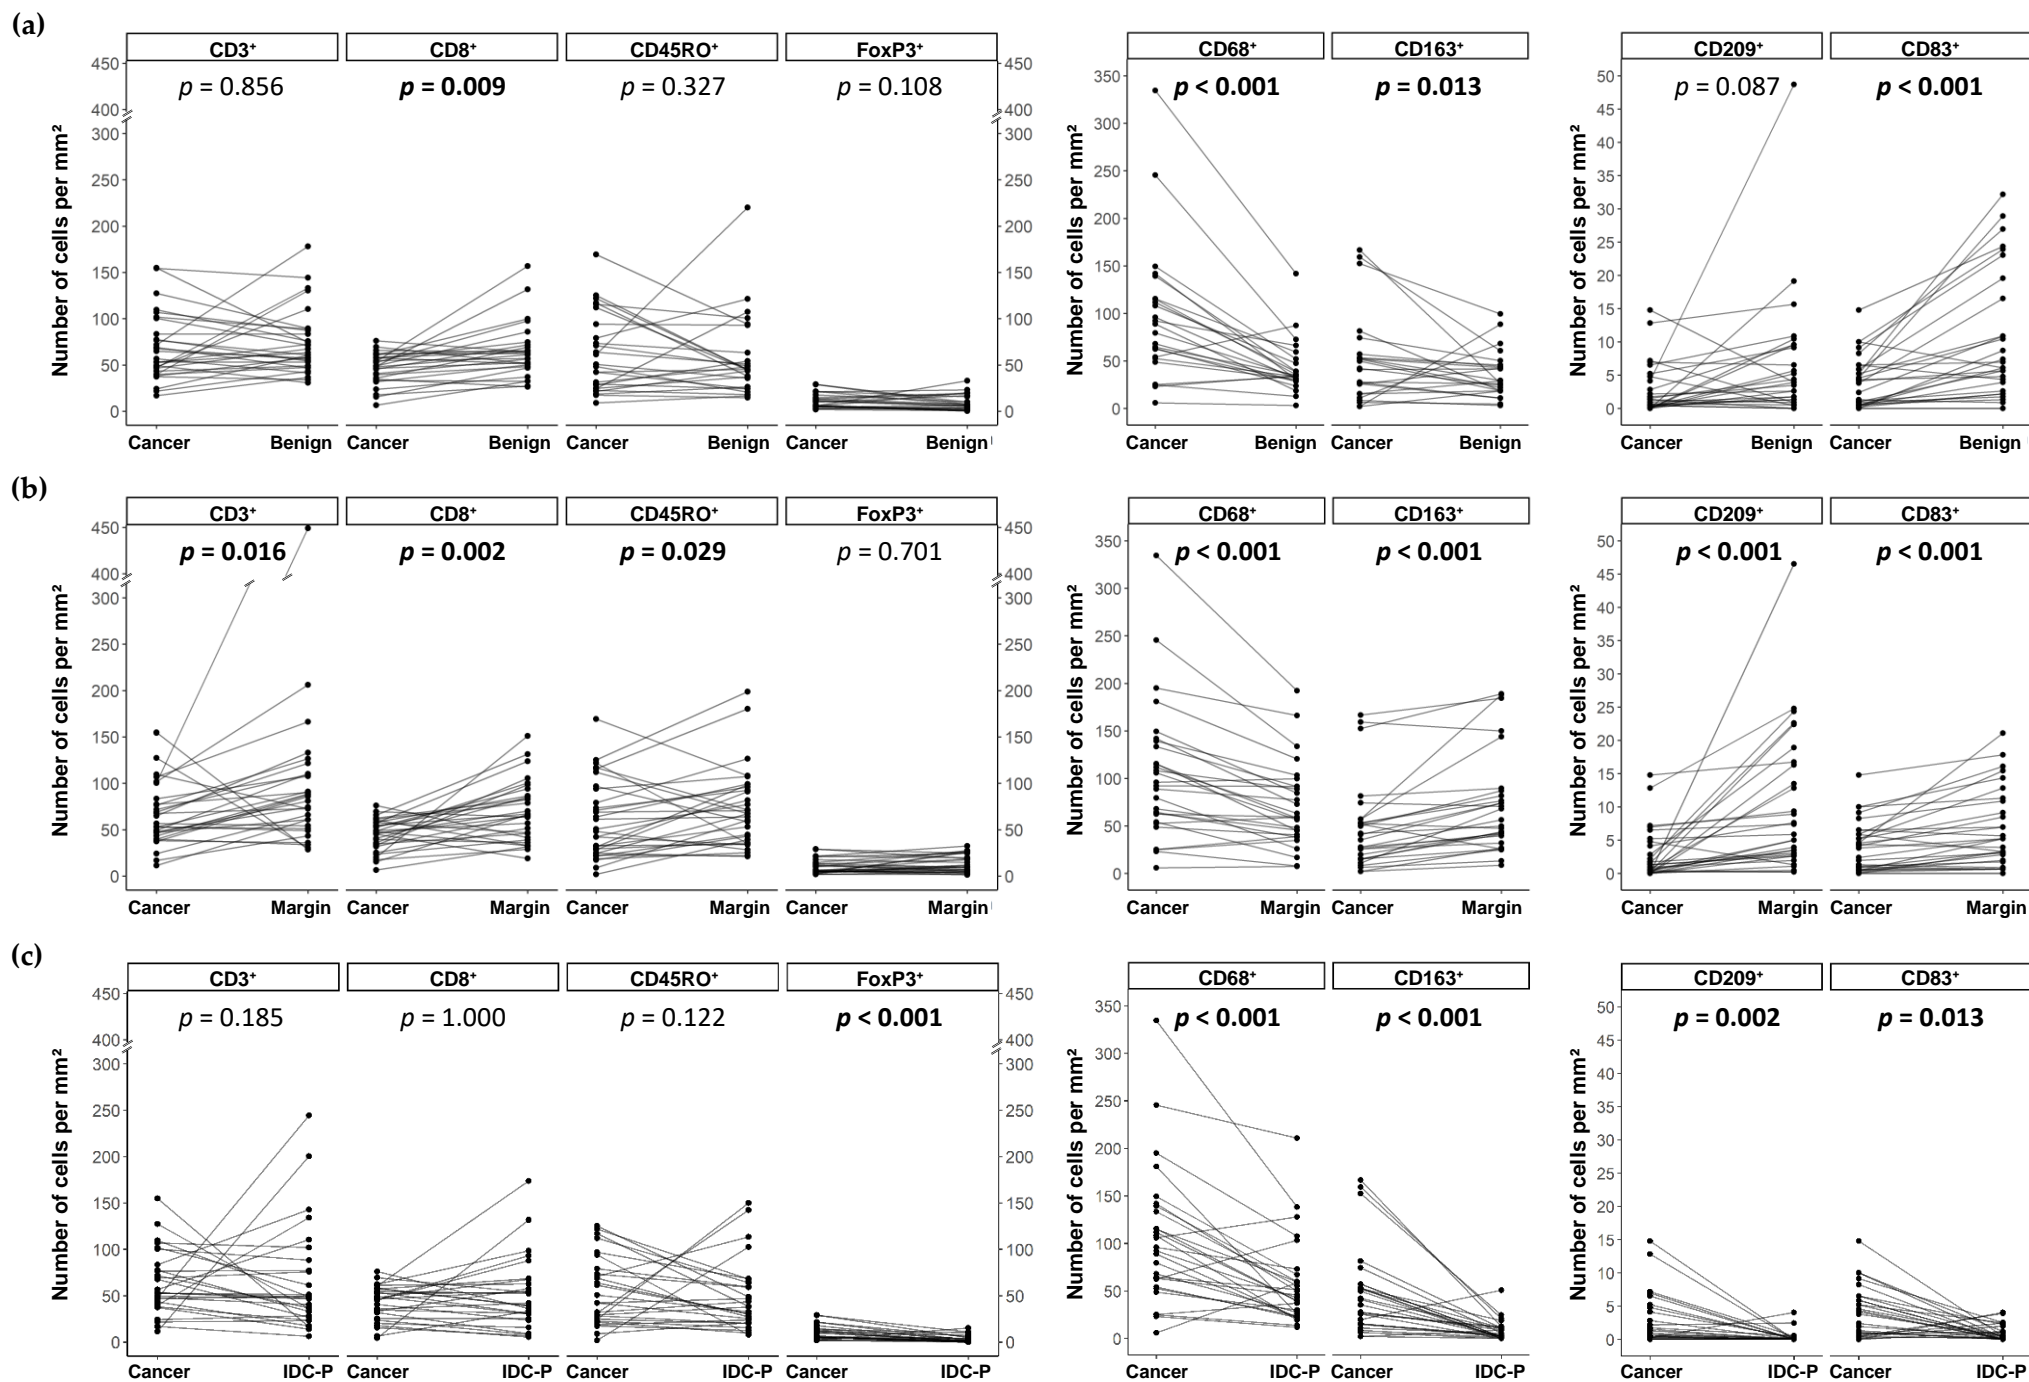

**Figure S1.** Parallel coordinate plots showing the changes in immune-cell densities between the cancer compartments and benign tissues (a), margins (b) and IDC-P (c) in patients with IDC-P. Paired-samples sign tests were performed. Bold entities indicate statistically significant  $p$ -values. IDC-P: intraductal carcinoma of the prostate.
